# Supplementary material
Source: publisher figshare collection journal article supplement (https://gsajournals.figshare.com/articles/dataset/_/5951581)
Supplement: Supplementary file 1 [file 1]

**Table S2** Estimated quantitative genetic parameters for locomotor activity.  $\hat{\sigma}_L^2$  and  $\hat{\sigma}_E^2$  signifies the among-line and within-line variance.

| Variance components | Estimate | Standard deviation | p-value   |
|---------------------|----------|--------------------|-----------|
| $\hat{\sigma}_L^2$  | 1873.265 | 43.28              | < 2.2e-16 |
| $\hat{\sigma}_E^2$  | 2850.78  | 53.39              |           |
